# Supplementary material for: MicroRNA199a-Based Post-transcriptional Detargeting of Gene Vectors for Hepatocellular Carcinoma
Source: PubMed Central journal article supplement — Mol Ther Nucleic Acids. 2018 Aug 24;13:78–88. doi: 10.1016/j.omtn.2018.08.016 (PMC6148835; doi:10.1016/j.omtn.2018.08.016), 2018-08-24
Supplement: mmc1.pdf [file mmc1.pdf]

**OMTN, Volume 13**

**Supplemental Information**

**MicroRNA199a-Based Post-transcriptional  
Detargeting of Gene Vectors for Hepatocellular  
Carcinoma**

**Bijay Dhungel, Charmaine A. Ramlogan-Steel, Christopher J. Layton, and Jason C. Steel**

**Supplementary Table 1:** List of primers used for qRT-PCR studies

| Gene  | Forward primer             | Reverse Primer              |
|-------|----------------------------|-----------------------------|
| CD44  | 5'-AGCGGCAGGTTACATTCAAA-3' | 5'-CAAGTTTTGGTGGCACACAG-3'  |
| CD133 | 5'-TAGAGGGAAGTCATTCGGCT-3' | 5'-CCCAAGATACCTTCAATGCTG-3' |
| Oct4  | 5'-TTCTAGCTCCTTCTGCAGGG-3' | 5'-AGAGGGAACCTCCTCTGAGC-3'  |

**Supplementary Figure 1**

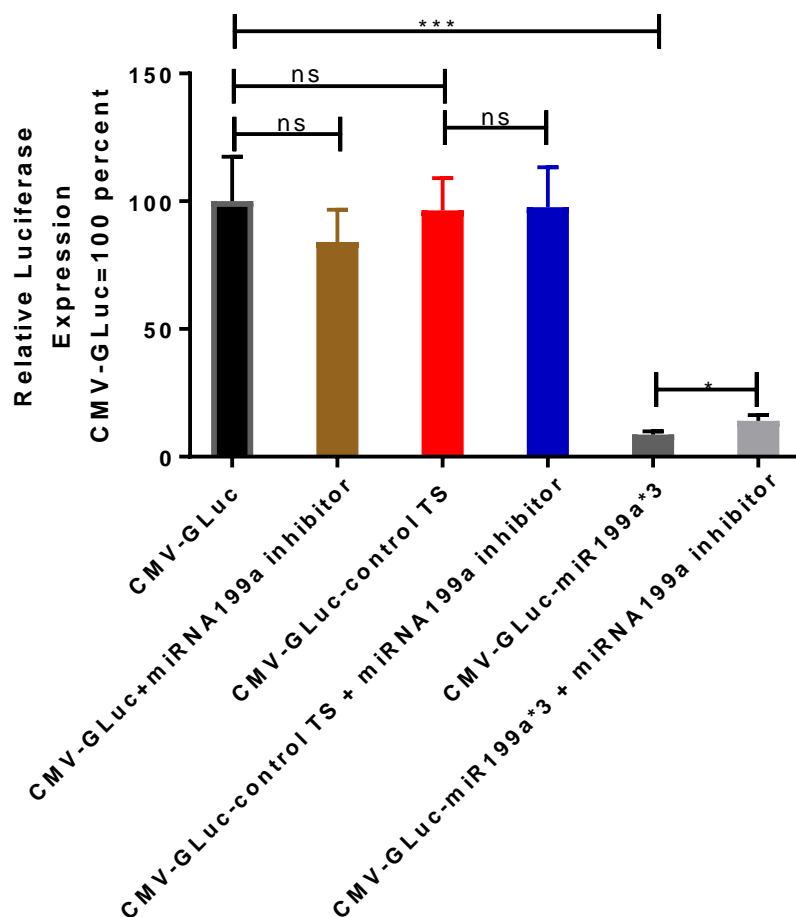

**Supplementary Figure 1:** Hepa1-6 cells were transfected with CMV-Gluc, CMV-Gluc-miR199a\*3, and the control plasmid CMV-Gluc-control TS. Similarly, cotransfection of miRNA199a inhibitor was performed with all three plasmids and the amount of secreted Gluc was quantified. Expression of the reporter after cell transfection with each group was reported as a percentage of that with CMV-Gluc. Two tailed t-test was performed to determine statistical significance of differences observed between indicated groups. (n>3, \* p<0.05, \*\*\* p<0.001)
